# Supplementary material for: Synthesis and Characterization of Activated Carbon Co-Mixed Electrospun Titanium Oxide Nanofibers as Flow Electrode in Capacitive Deionization
Source: MDPI journal article supplement (doi:10.3390/ma14226891), 2021-11-15
Supplement: s1 [file s1]

Supplementary information for

# Synthesis and Characterization of Activated Carbon Co-Mixed Electrospun Titanium Oxide Nanofibers as Flow Electrode in Capacitive Deionization

Gbenro Folaranmi, Myriam Tauk, Mikhael Bechelany, Philippe Sistat, Marc Cretin\* and Francois Zaviska\*

*Institut Européen des membranes, IEM, UMR-5635, Université de Montpellier, ENSCM, CNRS, Place Eugène Bataillon, 34095 Montpellier cedex 5, France.*

Corresponding author: marc.cretin@umontpellier.fr and francois.zaviska@umontpellier.fr

## 1.0 EDX Mapping

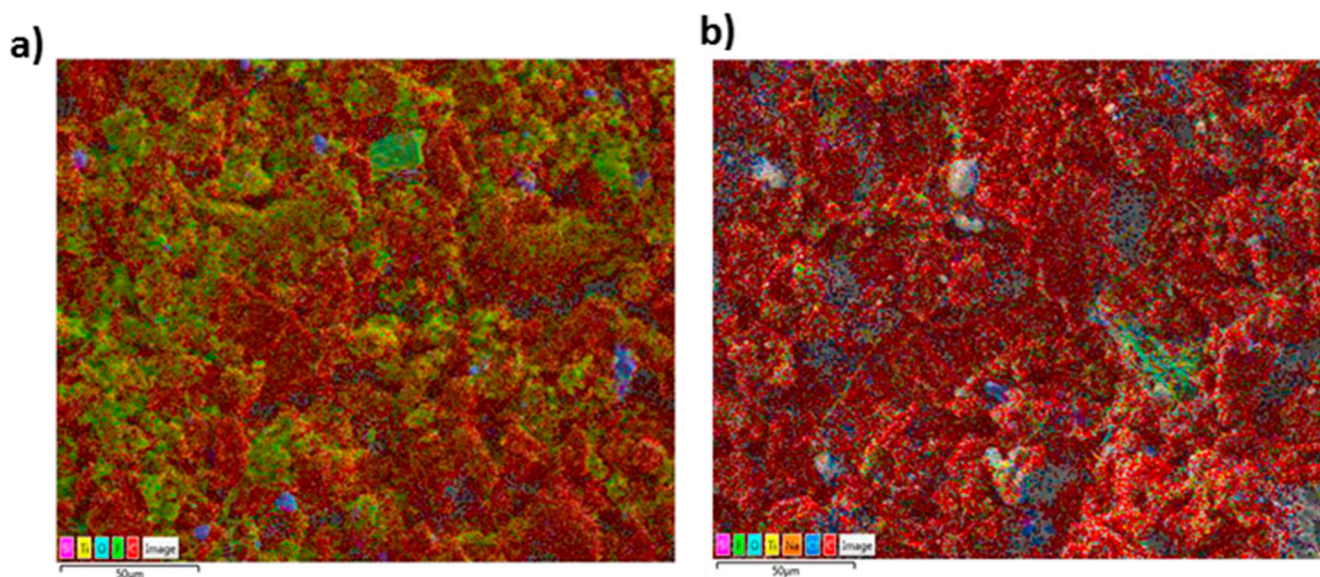

**Figure S1.** EDX mapping of (a) ACTiO<sub>2</sub>NFs-5.0 and (b) ACTiO<sub>2</sub>NFs-1.0.
